# Supplementary material for: Educational approaches to teach students to address colonialism in global health: a scoping review
Source: HighWire-hosted journal article supplement (doi:10.1136/bmjgh-2022-011610), 2023-04-01
Supplement: bmjgh-2022-011610supp001_data_supplement.pdf [file bmjgh-2022-011610supp001_data_supplement.pdf]

## Supplemental Material: Search Strategy in 5 Databases and Results (for original and updated search)

| Database       | Search terms                                                                                                                                                                                                                                                                                                                                                                                                                                                                                                                                                                                                                                                                                                                                                                                                                                                                                                                                                                                                                                                                      | Results                                                         |
|----------------|-----------------------------------------------------------------------------------------------------------------------------------------------------------------------------------------------------------------------------------------------------------------------------------------------------------------------------------------------------------------------------------------------------------------------------------------------------------------------------------------------------------------------------------------------------------------------------------------------------------------------------------------------------------------------------------------------------------------------------------------------------------------------------------------------------------------------------------------------------------------------------------------------------------------------------------------------------------------------------------------------------------------------------------------------------------------------------------|-----------------------------------------------------------------|
| Pubmed         | <p>("global health"[mh] OR "global health"[tw] OR "international health"[tw])<br/>AND<br/>("education, public health professional"[mh] OR "education"[mh] OR "educat*"[tw] OR "teach*"[tw] OR "train*"[tw] OR "curriculum"[mh] OR "curric*"[tw] OR "course*"[tw] OR "syllab*"[tw] OR "practicum"[tw] OR "practica"[tw] OR "fieldwork"[tw] OR "International Educational Exchange"[mh] OR "pedagog*"[tw])<br/>AND<br/>("colonialism"[mh] OR "coloni*"[tw] OR "decolon*"[tw] OR "neocoloni*"[tw] OR "structural competenc*"[tw] OR "structural violence"[tw] OR "structural inequal*"[tw] OR "cultural hegemon*"[tw] OR "white supremacy"[tw] OR "systemic racism"[tw] OR "structural racism"[tw] OR "global health engagement"[tw] OR "Cooperative Behavior"[mh] OR "Cooperative Behavior"[tw] OR "reciprocity"[tw] OR "Bioethics"[Mesh] OR "Bioethics"[tw] OR "Bioethical Issues"[Mesh] OR "bioethical issues"[tw] OR "global health engagement"[tw] OR "Cooperative Behavior"[mh] OR "Cooperative Behavior"[tw] OR "reciprocity"[tw] OR "saviorism"[tw] OR "saviourism"[tw])</p> | <p><a href="#">Results:</a><br/>379 on<br/>May 10,<br/>2021</p> |
| Embase         | <p>('global health'/exp OR 'global health' OR 'international health')<br/>AND<br/>(('education'/exp OR 'educat*' OR 'teaching'/exp OR 'teach*' OR 'curriculum'/exp OR 'curric*' OR 'course*' OR 'course content'/exp OR 'course evaluation'/exp OR 'syllab*' OR 'practicum' OR 'practica' OR 'field work' OR 'fieldwork' OR 'pedagog*' OR 'pedagogics'/exp)<br/>AND<br/>(('colonialism'/exp OR 'colonialism' OR 'coloni*' OR 'decoloni*' OR 'neocoloni'<br/>OR<br/>'structural competenc*' OR 'structural violence' OR 'structural inequal*' OR 'cultural hegemon*' OR 'white supremacy' OR 'systemic racism' OR 'structural racism'<br/>OR<br/>'global health diplomacy'/exp OR 'global health diplomacy' OR 'reciprocity'/exp OR 'reciprocity' OR 'social responsibility'/exp OR 'cultural competence'/exp OR 'structural competenc*' OR 'cultural hegemon*' OR 'cultural sensitivity' OR 'cultural sensitivity'/exp OR 'cultural competency' OR 'cultural humility' OR 'bioethics'/exp 'saviorism' OR 'saviourism')</p>                                                        | <p>525 on<br/>May 10,<br/>2021</p>                              |
| Web of Science | <p>("global health" OR "international health")<br/>AND<br/>("education" OR "educat*" OR "teach*" OR "train*" OR "curric*" OR "course*" OR "syllab*" OR "practicum" OR "practica" OR "fieldwork" OR "pedagog*")<br/>AND<br/>("coloni*" OR "decoloni*" OR "neocoloni*" OR "structural competenc*" OR "structural violence" OR "structural inequal*" OR "cultural hegemon*" OR "white supremacy" OR "systemic racism" OR "structural racism" OR "global health engagement" OR "reciprocity" OR "Bioethics" OR "bioethical issues" OR "global health engagement" OR "reciprocity" OR "saviorism" OR "saviourism")</p>                                                                                                                                                                                                                                                                                                                                                                                                                                                                 | <p>119 on<br/>May 10,<br/>2021</p>                              |
| CINAHL         | <p>("global health" OR "international health")<br/>AND<br/>(DE"Allied Health Occupations Education" OR "educat*" OR "teach*" OR "train*" OR "curric*" OR "course*" OR DE"course descriptions" OR "syllab*" OR "practicum" OR "practica" OR "fieldwork" OR "pedagog*" OR DE"teaching methods" OR DE"instruction" OR DE"instructional materials" OR DE"educational methods" OR DE"educational experience")<br/>AND<br/>("colonialism" OR "colonialism" OR "coloni*" OR "decoloni*" OR "neocoloni"</p>                                                                                                                                                                                                                                                                                                                                                                                                                                                                                                                                                                               | <p>251 on<br/>May 10,<br/>2021</p>                              |

|                                                                                        |                                                                                                                                                                                                                                                                                                                                                                                                                                                                                                                                                                                                                                                                                                                                                                                                                                                                                                                                                                                                                                                                                                                                                                                                                                                                                                                                                                                                                                                                                                                                                                                                                                                                                                                                                                                                                                                                                                                                                                 |                            |
|----------------------------------------------------------------------------------------|-----------------------------------------------------------------------------------------------------------------------------------------------------------------------------------------------------------------------------------------------------------------------------------------------------------------------------------------------------------------------------------------------------------------------------------------------------------------------------------------------------------------------------------------------------------------------------------------------------------------------------------------------------------------------------------------------------------------------------------------------------------------------------------------------------------------------------------------------------------------------------------------------------------------------------------------------------------------------------------------------------------------------------------------------------------------------------------------------------------------------------------------------------------------------------------------------------------------------------------------------------------------------------------------------------------------------------------------------------------------------------------------------------------------------------------------------------------------------------------------------------------------------------------------------------------------------------------------------------------------------------------------------------------------------------------------------------------------------------------------------------------------------------------------------------------------------------------------------------------------------------------------------------------------------------------------------------------------|----------------------------|
|                                                                                        | OR "structural competenc*" OR "structural violence" OR "structural inequal*" OR "cultural hegemon*" OR "white supremacy" OR "systemic racism" OR "structural racism"<br>OR "global health diplomacy" OR "global health diplomacy OR" "reciprocity" OR "reciprocity" OR "social responsibility" OR "cultural competence" OR "structural competenc*" OR "cultural hegemon*" OR "cultural sensitivity" OR "cultural sensitivity" OR "cultural competency" OR "cultural humility" OR "bioethics" OR "saviorism" OR "saviourism")                                                                                                                                                                                                                                                                                                                                                                                                                                                                                                                                                                                                                                                                                                                                                                                                                                                                                                                                                                                                                                                                                                                                                                                                                                                                                                                                                                                                                                    |                            |
| <b>ERIC</b>                                                                            | ("global health" OR "international health")<br>AND<br>(DE"Allied Health Occupations Education" OR "educat*" OR "teach*" OR "train*" OR "curric*" OR "course*" OR DE"course descriptions" OR "syllab*" OR "practicum" OR "practica" OR "fieldwork" OR "pedagog*" OR DE"teaching methods" OR DE"instruction" OR DE"instructional materials" OR DE"educational methods" OR DE"educational experience")<br>AND<br>("colonialism" OR "colonialism" OR "coloni*" OR "decoloni*" OR "neocoloni" OR "structural competenc*" OR "structural violence" OR "structural inequal*" OR "cultural hegemon*" OR "white supremacy" OR "systemic racism" OR "structural racism"<br>OR "global health diplomacy" OR "global health diplomacy OR" "reciprocity" OR "reciprocity" OR "social responsibility" OR "cultural competence" OR "structural competenc*" OR "cultural hegemon*" OR "cultural sensitivity" OR "cultural sensitivity" OR "cultural competency" OR "cultural humility" OR "bioethics" OR "saviorism" OR "saviourism")                                                                                                                                                                                                                                                                                                                                                                                                                                                                                                                                                                                                                                                                                                                                                                                                                                                                                                                                           | 18 on May 10, 2021         |
|                                                                                        | <b>TOTAL before de-duplication</b>                                                                                                                                                                                                                                                                                                                                                                                                                                                                                                                                                                                                                                                                                                                                                                                                                                                                                                                                                                                                                                                                                                                                                                                                                                                                                                                                                                                                                                                                                                                                                                                                                                                                                                                                                                                                                                                                                                                              | 1291                       |
|                                                                                        | <b>Total after de-duplication</b>                                                                                                                                                                                                                                                                                                                                                                                                                                                                                                                                                                                                                                                                                                                                                                                                                                                                                                                                                                                                                                                                                                                                                                                                                                                                                                                                                                                                                                                                                                                                                                                                                                                                                                                                                                                                                                                                                                                               | 1093                       |
| <b>Search February 17, 2022</b>                                                        |                                                                                                                                                                                                                                                                                                                                                                                                                                                                                                                                                                                                                                                                                                                                                                                                                                                                                                                                                                                                                                                                                                                                                                                                                                                                                                                                                                                                                                                                                                                                                                                                                                                                                                                                                                                                                                                                                                                                                                 |                            |
| <b>PubMed – addition of "power dynamic*"[tw]; "international service learning"[tw]</b> | ((("global health"[mh] OR "global health"[tw] OR "international health"[tw]) AND ("education, public health professional"[mh] OR "education"[mh] OR "educat*"[tw] OR "teach*"[tw] OR "train*"[tw] OR "curriculum"[mh] OR "curric*"[tw] OR "course*"[tw] OR "syllab*"[tw] OR "practicum"[tw] OR "practica"[tw] OR "fieldwork"[tw] OR "International Educational Exchange"[mh] OR "pedagog*"[tw] OR "international service learning"[tw]) AND ("colonialism"[mh] OR "coloni*"[tw] OR "decolon*"[tw] OR "neocoloni*"[tw] OR "structural competenc*"[tw] OR "structural violence"[tw] OR "structural inequal*"[tw] OR "cultural hegemon*"[tw] OR "white supremacy"[tw] OR "systemic racism"[tw] OR "structural racism"[tw] OR "global health engagement"[tw] OR "Cooperative Behavior"[mh] OR "Cooperative Behavior"[tw] OR "reciprocity"[tw] OR "Bioethics"[Mesh] OR "Bioethics"[tw] OR "Bioethical Issues"[Mesh] OR "bioethical issues"[tw] OR "savior*"[tw] OR "saviour*"[tw] OR "power dynamic*"[tw]))))<br>NOT<br>(("global health"[mh] OR "global health"[tw] OR "international health"[tw]) AND ("education, public health professional"[mh] OR "education"[mh] OR "educat*"[tw] OR "teach*"[tw] OR "train*"[tw] OR "curriculum"[mh] OR "curric*"[tw] OR "course*"[tw] OR "syllab*"[tw] OR "practicum"[tw] OR "practica"[tw] OR "fieldwork"[tw] OR "International Educational Exchange"[mh] OR "pedagog*"[tw]) AND ("colonialism"[mh] OR "coloni*"[tw] OR "decolon*"[tw] OR "neocoloni*"[tw] OR "structural competenc*"[tw] OR "structural violence"[tw] OR "structural inequal*"[tw] OR "cultural hegemon*"[tw] OR "white supremacy"[tw] OR "systemic racism"[tw] OR "structural racism"[tw] OR "global health engagement"[tw] OR "Cooperative Behavior"[mh] OR "Cooperative Behavior"[tw] OR "reciprocity"[tw] OR "Bioethics"[Mesh] OR "Bioethics"[tw] OR "Bioethical Issues"[Mesh] OR "bioethical issues"[tw] OR "saviorism"[tw] OR "saviourism" [tw])))) | 13 results on Feb 17, 2022 |
| <b>Embase</b>                                                                          | (('global health'/exp OR 'global health' OR 'international health') AND ('education'/exp OR 'educat*' OR 'teaching'/exp OR 'teach*' OR 'curriculum'/exp OR 'curric*' OR 'course*' OR 'course content'/exp OR 'course evaluation'/exp OR 'syllab*' OR                                                                                                                                                                                                                                                                                                                                                                                                                                                                                                                                                                                                                                                                                                                                                                                                                                                                                                                                                                                                                                                                                                                                                                                                                                                                                                                                                                                                                                                                                                                                                                                                                                                                                                            | <b>25 on Feb 17, 2022</b>  |

|                              |                                                                                                                                                                                                                                                                                                                                                                                                                                                                                                                                                                                                                                                                                                                                                                                                                                                                                                                                                                                                                                                                                                                                                                                                                                                                                                                                                                                                                                                                                                                                                                                                                                                                                                                                             |                                   |
|------------------------------|---------------------------------------------------------------------------------------------------------------------------------------------------------------------------------------------------------------------------------------------------------------------------------------------------------------------------------------------------------------------------------------------------------------------------------------------------------------------------------------------------------------------------------------------------------------------------------------------------------------------------------------------------------------------------------------------------------------------------------------------------------------------------------------------------------------------------------------------------------------------------------------------------------------------------------------------------------------------------------------------------------------------------------------------------------------------------------------------------------------------------------------------------------------------------------------------------------------------------------------------------------------------------------------------------------------------------------------------------------------------------------------------------------------------------------------------------------------------------------------------------------------------------------------------------------------------------------------------------------------------------------------------------------------------------------------------------------------------------------------------|-----------------------------------|
|                              | <p>'practicum' OR 'practica' OR 'field work' OR 'fieldwork' OR 'pedagog*' OR 'pedagogics'/exp OR 'international service learning') AND ('colonialism'/exp OR 'coloni*' OR 'decoloni*' OR 'neocoloni*' OR 'structural competenc*' OR 'structural violence' OR 'structural inequal*' OR 'cultural hegemon*' OR 'white supremacy' OR 'systemic racism' OR 'structural racism' OR 'global health diplomacy'/exp OR 'global health diplomacy' OR 'reciprocity'/exp OR 'reciprocity' OR 'social responsibility'/exp OR 'cultural competency'/exp OR 'cultural competenc*' OR 'cultural hegemon*' OR 'cultural sensitivity' OR 'cultural sensitivity'/exp OR 'cultural humility' OR 'bioethics'/exp OR 'savior*' OR 'saviour*' OR 'power dynamic*'))</p> <p>NOT</p> <p>((('global health'/exp OR 'global health' OR 'international health') AND ('education'/exp OR 'educat*' OR 'teaching'/exp OR 'teach*' OR 'curriculum'/exp OR 'curric*' OR 'course*' OR 'course content'/exp OR 'course evaluation'/exp OR 'syllab*' OR 'practicum' OR 'practica' OR 'field work' OR 'fieldwork' OR 'pedagog*' OR 'pedagogics'/exp) AND ('colonialism'/exp OR 'coloni*' OR 'decoloni*' OR 'neocoloni*' OR 'structural competenc*' OR 'structural violence' OR 'structural inequal*' OR 'cultural hegemon*' OR 'white supremacy' OR 'systemic racism' OR 'structural racism' OR 'global health diplomacy'/exp OR 'global health diplomacy' OR 'reciprocity'/exp OR 'reciprocity' OR 'social responsibility'/exp OR 'cultural competence'/exp OR 'structural competenc*' OR 'cultural hegemon*' OR 'cultural sensitivity' OR 'cultural sensitivity'/exp OR 'cultural competenc*' OR 'cultural humility' OR 'bioethics'/exp OR 'saviorism' OR 'saviourism'))</p> |                                   |
| <p><b>Web of Science</b></p> | <p>((("global health" OR "international health") AND ("education" OR "educat*" OR "teach*" OR "train*" OR "curric*" OR "course*" OR "syllab*" OR "practicum" OR "practica" OR "fieldwork" OR "pedagog*" OR "international service learning") AND ("coloni*" OR "decoloni*" OR "neocoloni*" OR "structural competenc*" OR "structural violence" OR "structural inequal*" OR "cultural hegemon*" OR "white supremacy" OR "systemic racism" OR "structural racism" OR "global health diplomacy" OR "reciprocity" OR "social responsibility" OR "cultural competenc*" OR "structural competenc*" OR "cultural hegemon*" OR "cultural sensitivity" OR "cultural humility" OR "bioethics*" OR "savior*" OR "saviour*" OR "power dynamic*"))</p> <p>NOT</p> <p>((("global health" OR "international health") AND ("education" OR "educat*" OR "teach*" OR "train*" OR "curric*" OR "course*" OR "syllab*" OR "practicum" OR "practica" OR "fieldwork" OR "pedagog*") AND ("coloni*" OR "decoloni*" OR "neocoloni*" OR "structural competenc*" OR "structural violence" OR "structural inequal*" OR "cultural hegemon*" OR "white supremacy" OR "systemic racism" OR "structural racism" OR "global health engagement" OR "reciprocity" OR "bioethics" OR "bioethical issues" OR "saviorism" OR "saviourism"))</p>                                                                                                                                                                                                                                                                                                                                                                                                                                  | <p><b>126 on Feb 17, 2022</b></p> |
| <p><b>CINAHL</b></p>         | <p>((("global health" OR "international health") AND (DE"Allied Health Occupations Education" OR "educat*" OR "teach*" OR "train*" OR "curric*" OR "course*" OR DE"course descriptions" OR "syllab*" OR "practicum" OR "practica" OR "fieldwork" OR "pedagog*" OR DE"teaching methods" OR DE"instruction" OR DE"instructional materials" OR DE"educational methods" OR DE"educational experience" OR "international service learning") AND ("coloni*" OR "decoloni*" OR "neocoloni*" OR "structural competenc*" OR "structural violence" OR "structural inequal*" OR "cultural hegemon*" OR "white supremacy" OR "systemic racism" OR "structural racism" OR "global health diplomacy" OR "reciprocity" OR "social responsibility" OR "cultural competenc*" OR "structural competenc*" OR "cultural hegemon*" OR "cultural sensitivity" OR "cultural humility" OR "bioethics*" OR "savior*" OR "saviour*" OR "power dynamic*"))</p> <p>NOT</p> <p>((("global health" OR "international health") AND (DE"Allied Health Occupations Education" OR "educat*" OR "teach*" OR "train*" OR "curric*" OR "course*" OR DE"course descriptions" OR "syllab*" OR "practicum" OR "practica" OR "fieldwork" OR</p>                                                                                                                                                                                                                                                                                                                                                                                                                                                                                                                                      | <p><b>4 on Feb 17, 2022</b></p>   |

|      |                                                                                                                                                                                                                                                                                                                                                                                                                                                                                                                                                                                                                                                                                                                                                                                                                                                                                                                                                                                                                                                                                                                                                                                                                                                                                                                                                                                                                                                                                                                                                                                                                                                                                                  |                   |
|------|--------------------------------------------------------------------------------------------------------------------------------------------------------------------------------------------------------------------------------------------------------------------------------------------------------------------------------------------------------------------------------------------------------------------------------------------------------------------------------------------------------------------------------------------------------------------------------------------------------------------------------------------------------------------------------------------------------------------------------------------------------------------------------------------------------------------------------------------------------------------------------------------------------------------------------------------------------------------------------------------------------------------------------------------------------------------------------------------------------------------------------------------------------------------------------------------------------------------------------------------------------------------------------------------------------------------------------------------------------------------------------------------------------------------------------------------------------------------------------------------------------------------------------------------------------------------------------------------------------------------------------------------------------------------------------------------------|-------------------|
|      | "pedagog*" OR DE"teaching methods" OR DE"instruction" OR DE"instructional materials" OR DE"educational methods" OR DE"educational experience") AND ("coloni*" OR "decoloni*" OR "neocoloni*" OR "structural competenc*" OR "structural violence" OR "structural inequal*" OR "cultural hegemon*" OR "white supremacy" OR "systemic racism" OR "structural racism" OR "global health diplomacy" OR "reciprocity" OR "social responsibility" OR "cultural competenc*" OR "structural competenc*" OR "cultural sensitivity" OR "cultural humility" OR "bioethic*" OR "saviorism" OR "saviourism"))                                                                                                                                                                                                                                                                                                                                                                                                                                                                                                                                                                                                                                                                                                                                                                                                                                                                                                                                                                                                                                                                                                  |                   |
| ERIC | (("global health" OR "international health") AND (DE"Allied Health Occupations Education" OR "educat*" OR "teach*" OR "train*" OR "curric*" OR "course*" OR DE"course descriptions" OR "syllab*" OR "practicum" OR "practica" OR "fieldwork" OR "pedagog*" OR DE"teaching methods" OR DE"instruction" OR DE"instructional materials" OR DE"educational methods" OR DE"educational experience" OR "international service learning") AND ("coloni*" OR "decoloni*" OR "neocoloni*" OR "structural competenc*" OR "structural violence" OR "structural inequal*" OR "cultural hegemon*" OR "white supremacy" OR "systemic racism" OR "structural racism" OR "global health diplomacy" OR "reciprocity" OR "social responsibility" OR "cultural competenc*" OR "cultural sensitivity" OR "cultural humility" OR "bioethics" OR "savior*" OR "saviour*" OR "power dynamic*")) NOT ("global health" OR "international health") AND (DE"Allied Health Occupations Education" OR "educat*" OR "teach*" OR "train*" OR "curric*" OR "course*" OR DE"course descriptions" OR "syllab*" OR "practicum" OR "practica" OR "fieldwork" OR "pedagog*" OR DE"teaching methods" OR DE"instruction" OR DE"instructional materials" OR DE"educational methods" OR DE"educational experience") AND ("coloni*" OR "decoloni*" OR "neocoloni*" OR "structural competenc*" OR "structural violence" OR "structural inequal*" OR "cultural hegemon*" OR "white supremacy" OR "systemic racism" OR "structural racism" OR "global health diplomacy" OR "reciprocity" OR "social responsibility" OR "cultural competenc*" OR "cultural sensitivity" OR "cultural humility" OR "bioethics" OR "saviorism" OR "saviourism")) | 0 on Feb 17, 2022 |
|      | TOTAL before de-duplication<br>Total after de-duplication                                                                                                                                                                                                                                                                                                                                                                                                                                                                                                                                                                                                                                                                                                                                                                                                                                                                                                                                                                                                                                                                                                                                                                                                                                                                                                                                                                                                                                                                                                                                                                                                                                        | 168<br>59         |
